# Supplementary material for: Influence of Friction Stir Surface Processing on the Corrosion Resistance of Al 6061
Source: MDPI journal article supplement (doi:10.3390/ma15228124), 2022-11-16
Supplement: s1 [file s1]

Table S1: Typical grain morphology information for FP-10 sample drawn from the Olympus stream analysis software

|                                             |               |  |
|---------------------------------------------|---------------|--|
| Reference                                   | FP-10         |  |
| Standard                                    | ASTM E 112-13 |  |
| Grain Size Number G                         | 8.35          |  |
| Mean Intercept Length [ $\mu\text{m}$ ]     | 17.74         |  |
| Elongation                                  | 0.98          |  |
| Average Number of Intercepts                | 180.00        |  |
| Number of Intercepts per Unit Length [1/mm] | 56.36         |  |

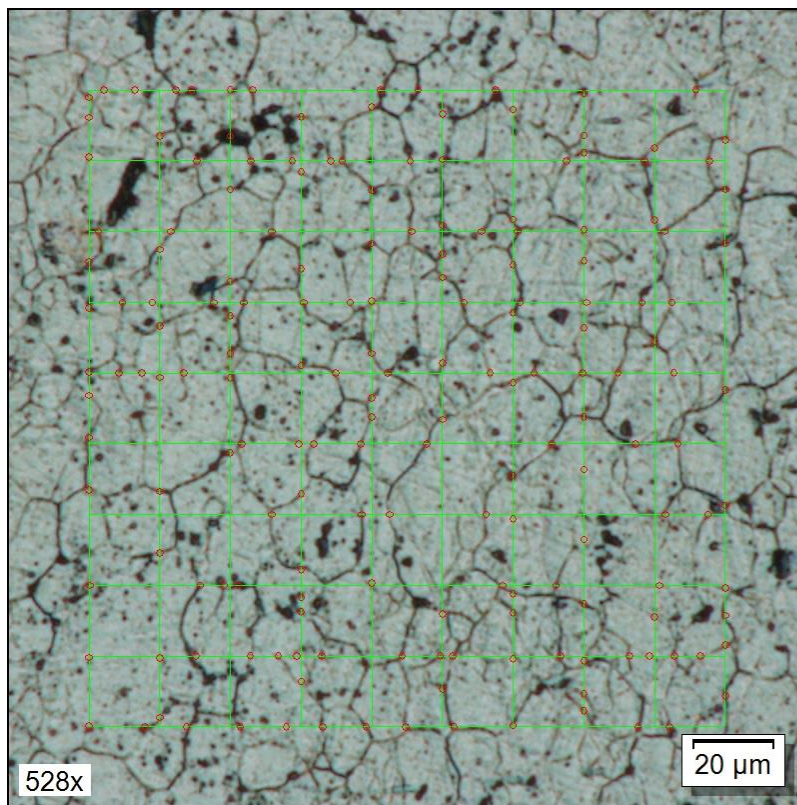

Figure S1: Optical micrograph for FP-10 sample to demonstrate the method adopted to measure the mean grain size

Table S2: Typical grain morphology information for FP-15 sample drawn from the Olympus stream analysis software

|                                                      |               |
|------------------------------------------------------|---------------|
| Reference                                            | FP-15         |
| Standard                                             | ASTM E 112-13 |
| Grain Size<br>Number G                               | 8.58          |
| Mean Intercept<br>Length [ $\mu\text{m}$ ]           | 16.38         |
| Elongation                                           | 0.91          |
| Average Number<br>of Intercepts                      | 195.00        |
| Number of<br>Intercepts per<br>Unit Length<br>[1/mm] | 61.06         |

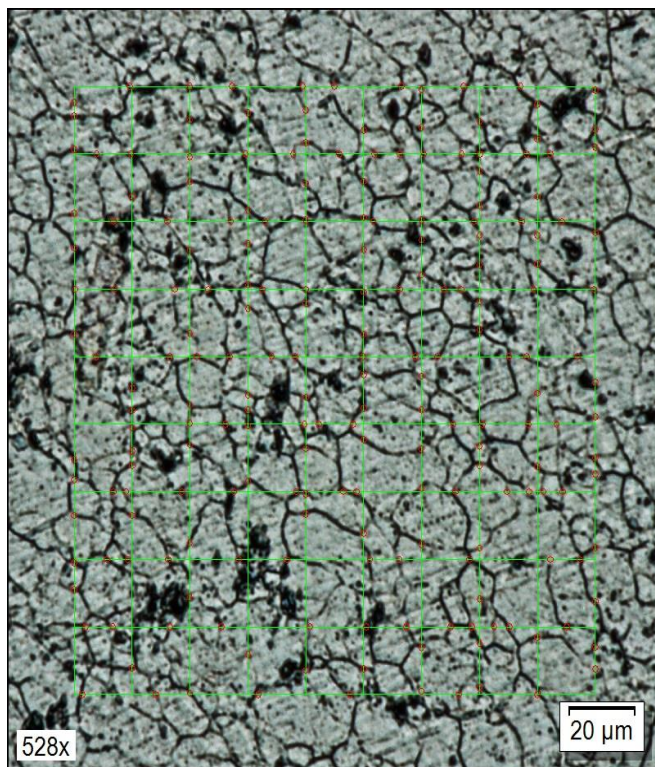

Figure S2: Optical micrograph for FP-15 sample to demonstrate the method adopted to measure the mean grain size

Table S3: Typical grain morphology information for FP-25 sample drawn from the Olympus stream analysis software

|                                                      |               |  |
|------------------------------------------------------|---------------|--|
| Reference                                            | FP-25         |  |
| Standard                                             | ASTM E 112-13 |  |
| Grain Size<br>Number G                               | 8.72          |  |
| Mean Intercept<br>Length [ $\mu\text{m}$ ]           | 15.58         |  |
| Elongation                                           | 1.09          |  |
| Average<br>Number of<br>Intercepts                   | 205.00        |  |
| Number of<br>Intercepts per<br>Unit Length<br>[1/mm] | 64.19         |  |

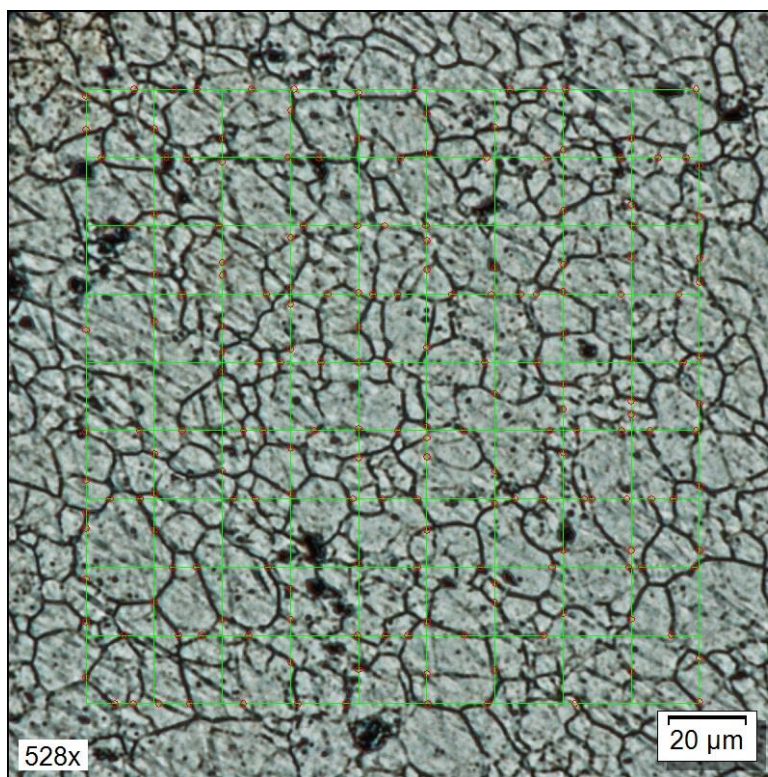

Figure S3: Optical micrograph for FP-25 sample to demonstrate the method adopted to measure the mean grain size



Table S4: Typical grain morphology information for the base sample drawn from the Olympus stream analysis software

|                                             |               |
|---------------------------------------------|---------------|
| Reference                                   | BASE          |
| Standard                                    | ASTM E 112-13 |
| Grain Size Number G                         | 3.54          |
| Mean Intercept Length [ $\mu\text{m}$ ]     | 93.93         |
| Elongation                                  | 0.74          |
| Average Number of Intercepts                | 68.00         |
| Number of Intercepts per Unit Length [1/mm] | 10.65         |

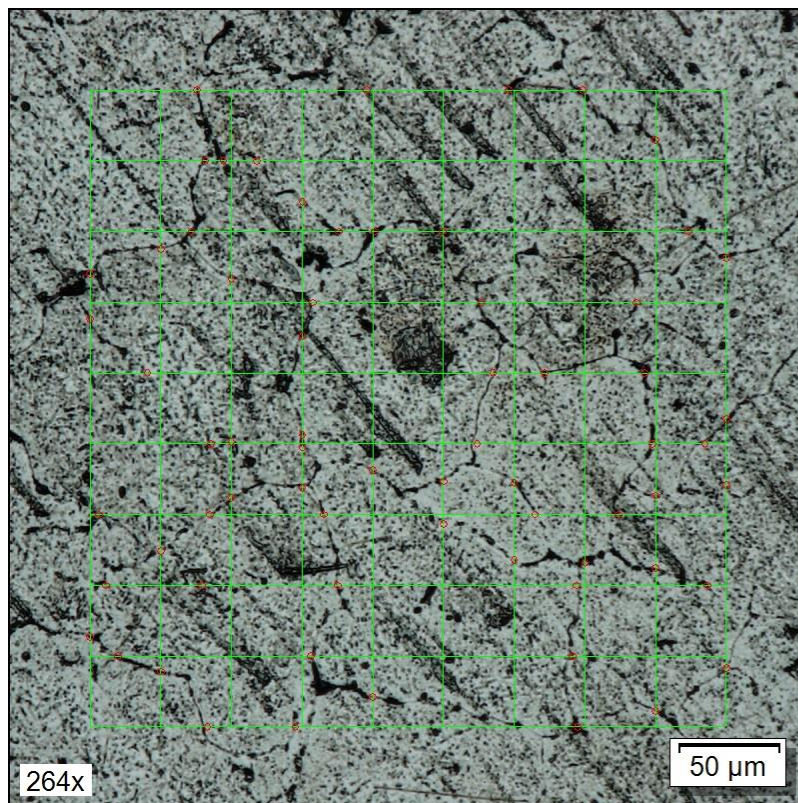

Figure S4: Optical micrograph for base sample to demonstrate the method adopted to measure the mean grain size
